# Supplementary material for: Long noncoding RNA DNM3OS promotes prostate stromal cells transformation via the miR-29a/29b/COL3A1 and miR-361/TGFβ1 axes
Source: publisher site journal article supplement (doi:10.18632/aging.102395), 2019-11-06
Supplement: Supplementary file [file aging-v11i21-102395-supplementary-material-SD1.pdf]

**SUPPLEMENTARY FIGURE**

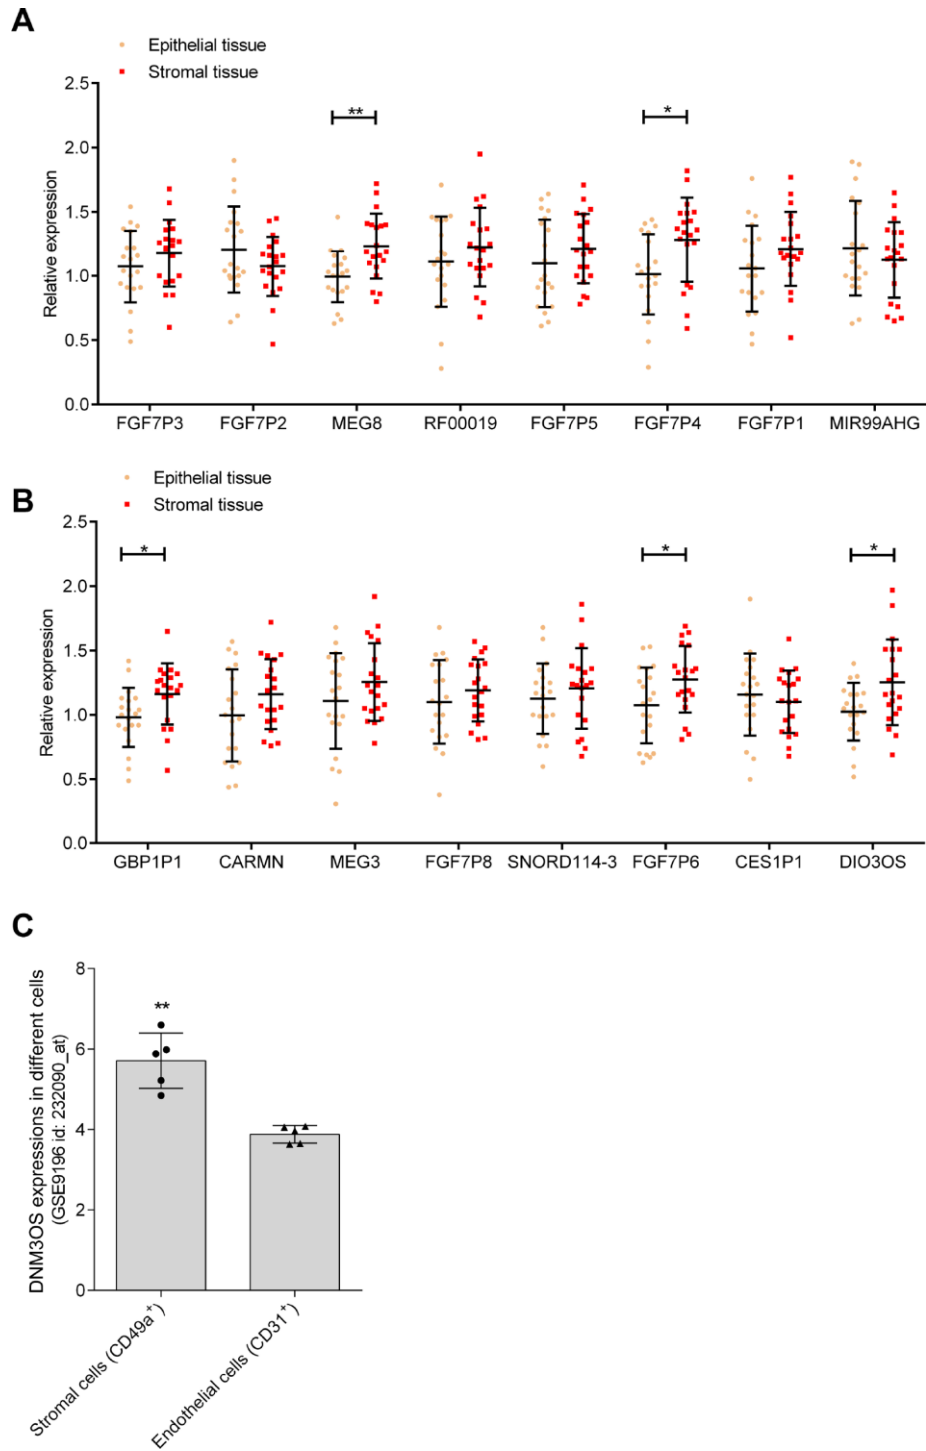

**Supplementary Figure 1. Expression of candidate lncRNAs in tissue samples or cells based on online data.**
